# Supplementary material for: Prediction of the secondary structure of short DNA aptamers
Source: PubMed Central journal article supplement — Biophys Physicobiol. 2019 Nov 29;16:287–94. doi: 10.2142/biophysico.16.0_287 (PMC6975895; doi:10.2142/biophysico.16.0_287), 2019-11-29
Supplement: 16_287_1.pdf [file 16_287_1.pdf]

### **Analysis of sequence motives in G-quadruplex folding groups**

We performed the multiple alignment analysis of the aptamer sequences, for the most populated folding type (Supplementary Figs. S1-S3). The analysis was performed using Align tool in ICM-pro software package ([http://www.molsoft.com/icm\\_pro.html](http://www.molsoft.com/icm_pro.html)) and was applied for single-stranded aptamers from folding groups 2,3,6 and 9 (Fig. 4), as the most populated folding types, observed in available crystal structures. To improve the quality of multiple sequence analysis we excluded sequences, forming gaps. Resulted alignment for folding type 6 (“unimolecular chair”) was formed by 21 sequences and sequence similarity score of 100% (Supplementary Fig. S1); alignment of sequences from folding type 3 consist of 8 sequences, sequence similarity score 79% (Supplementary Fig. S2); we combined alignment for groups 2 and 9, since they consist of aptamers with very close sequences, the resulted alignment consists of 35 sequences with score of 78% (Supplementary Fig. S3).

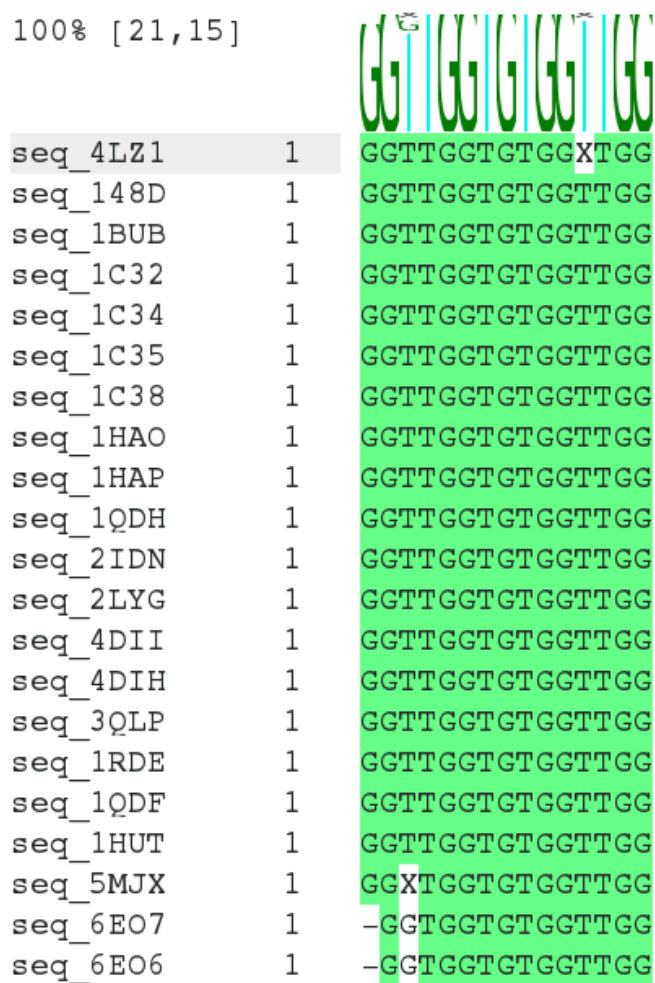

**Supplementary Figure S1** Multiple alignment analysis of aptamer sequences having folding type 6 (“unimolecular chair”).

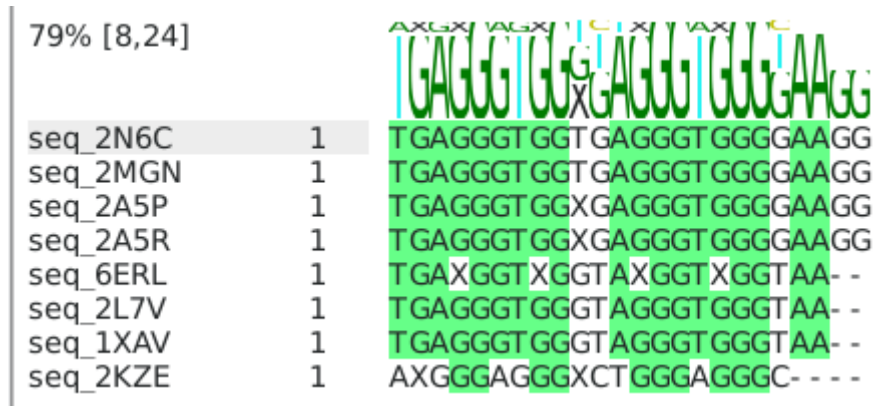

**Supplementary Figure S2** Multiple alignment analysis of aptamer sequences having folding type 3.

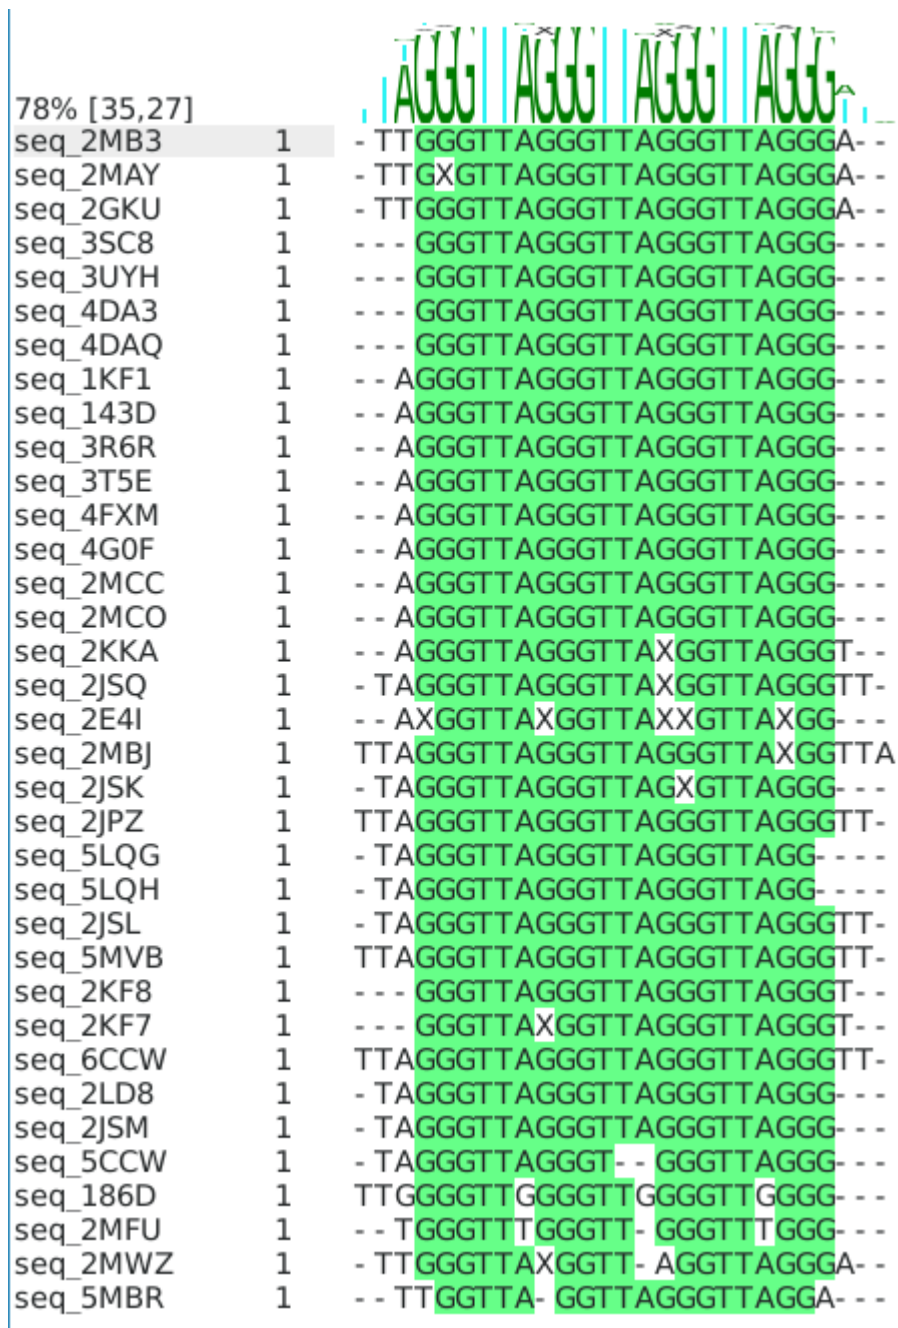

**Supplementary Figure S3** Joined multiple alignments of aptamer sequences having folding types 2 and 9.
